# Supplementary material for: Nano-enzymatic functionalized dual network hydrogel promotes tendon repair by modulating the inflammatory cycle and cellular behavior
Source: Royal Society of Chemistry journal article supplement (doi:10.1039/d5bm00441a), 2025-01-01
Supplement: d5bm00441a1.pdf [file d5bm00441a1.pdf]

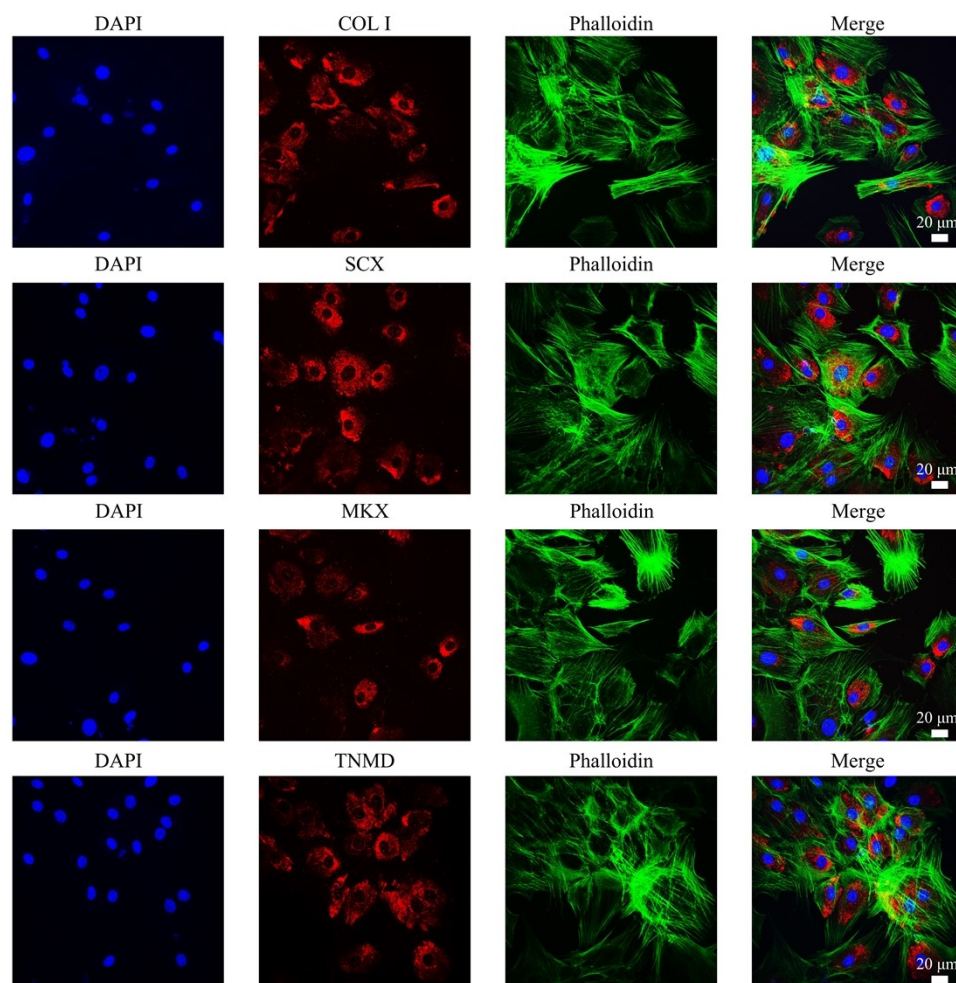

Figure S1 Immunofluorescence for different markers was used to identify the target cells as tendon stem cells.

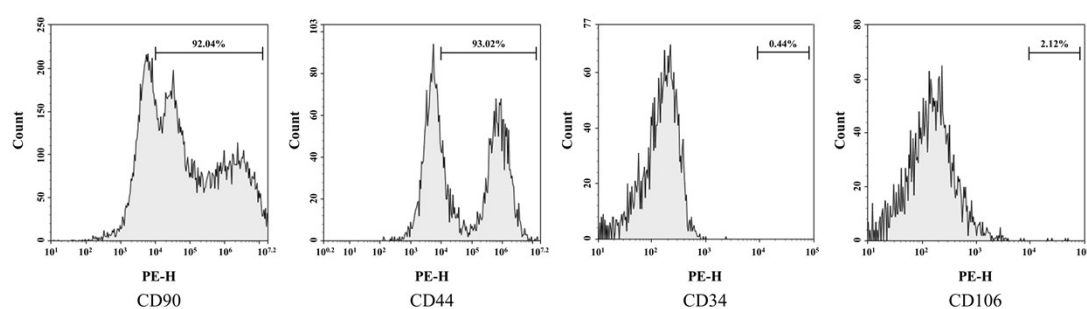

Figure S2 Characterization of acquired cells for tendon-derived stem cells using surface marker-based flow cytometry techniques.

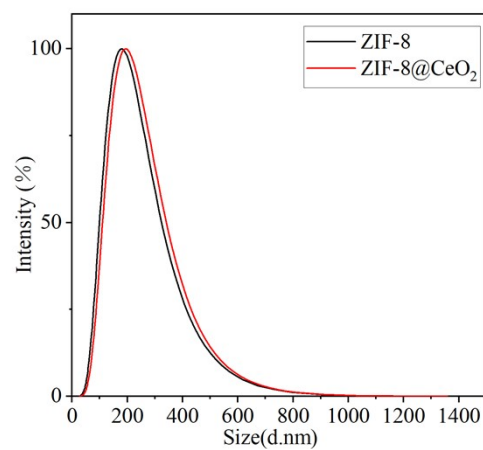

Figure S3 Probing the changes that occur in the particle size of ZIF-8 before and after it binds to CeO<sub>2</sub>.

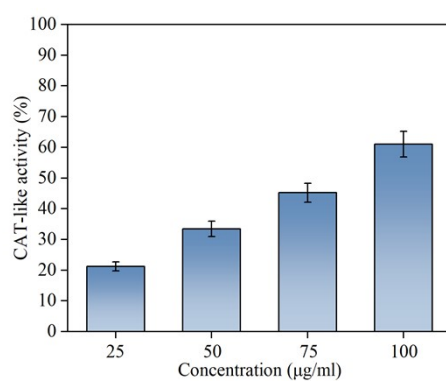

Figure S4 CAT activity under different concentrations of ZIF-8@CeO<sub>2</sub>.

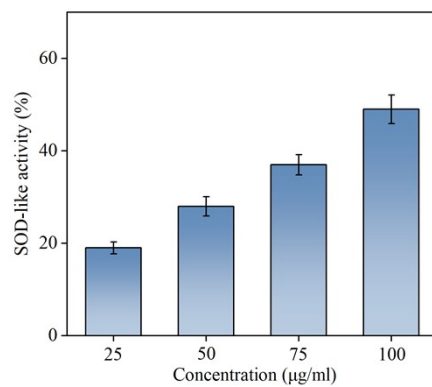

Figure S5 SOD activity under different concentrations of ZIF-8@CeO<sub>2</sub>.

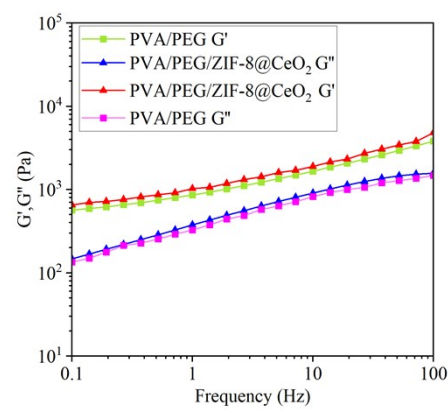

Figure S6 Frequency sweep dynamic rheological data for different samples.

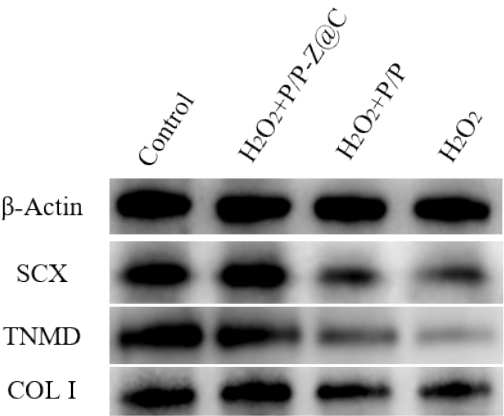

Figure S7 Protein expression of TNMD, SCX, and COL I in TDSCs of each group.

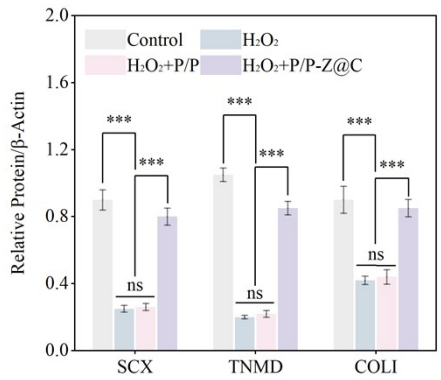

Figure S8 Protein quantification analysis of TNMD, SCX, and COL I in each group of

TDSCs.

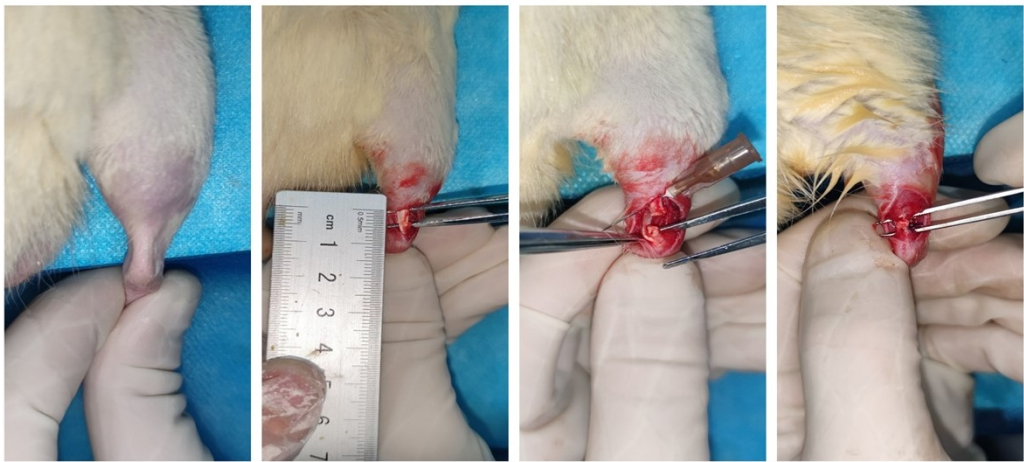

Figure S9 Construction and intervention in an animal model of Achilles tendon rupture.

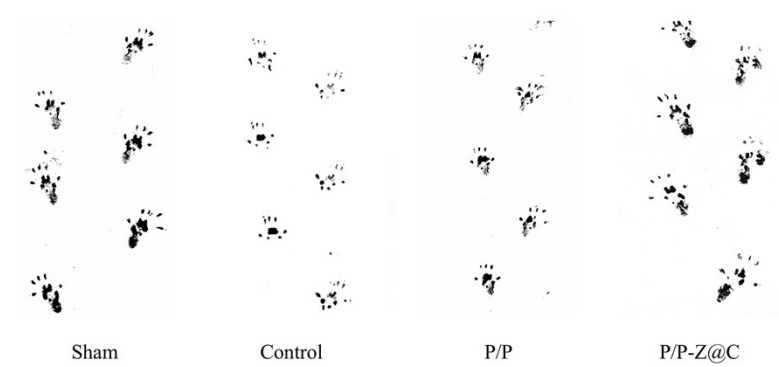

Figure S10 Gait analysis of rats in each group at 4 weeks postoperatively.

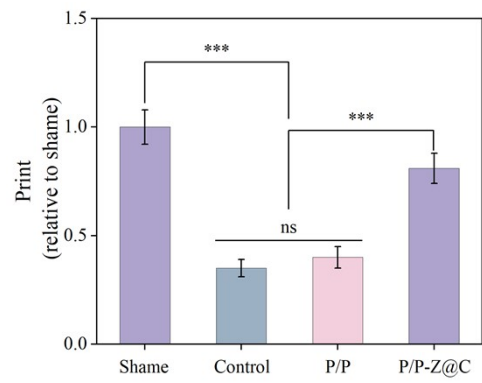

Figure S11 Quantification of paw print area in rats from each group 4 weeks

postoperatively.

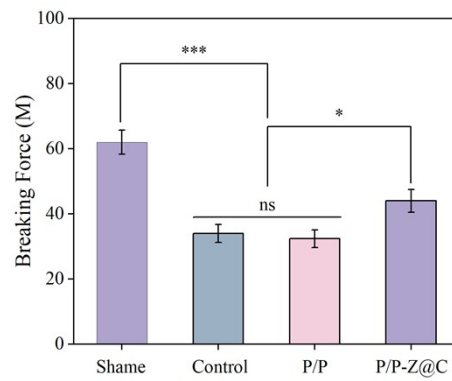

Figure S12 Maximum load on each group of tendons at 4 weeks postoperatively.

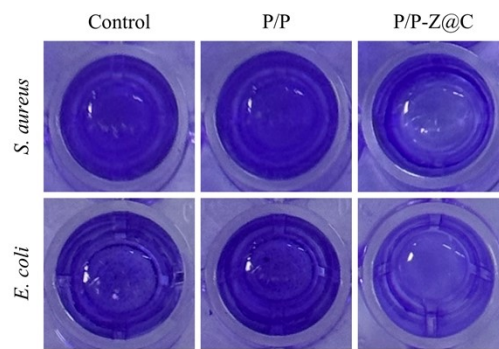

Figure S13 Crystal violet staining of bacterial biofilms after different hydrogel interventions.

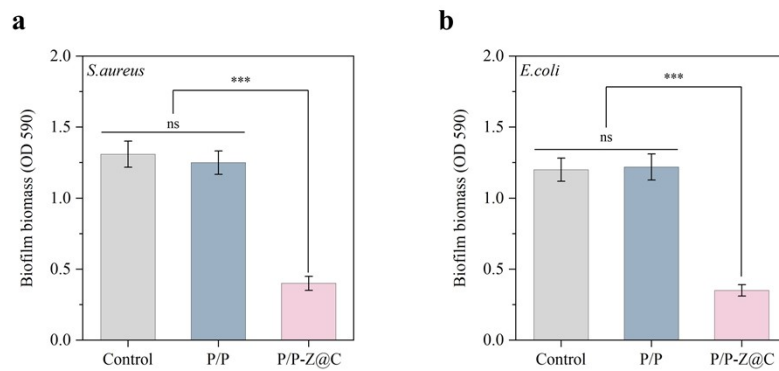

Figure S14 Quantitative analysis of crystal violet staining of bacterial biofilms.



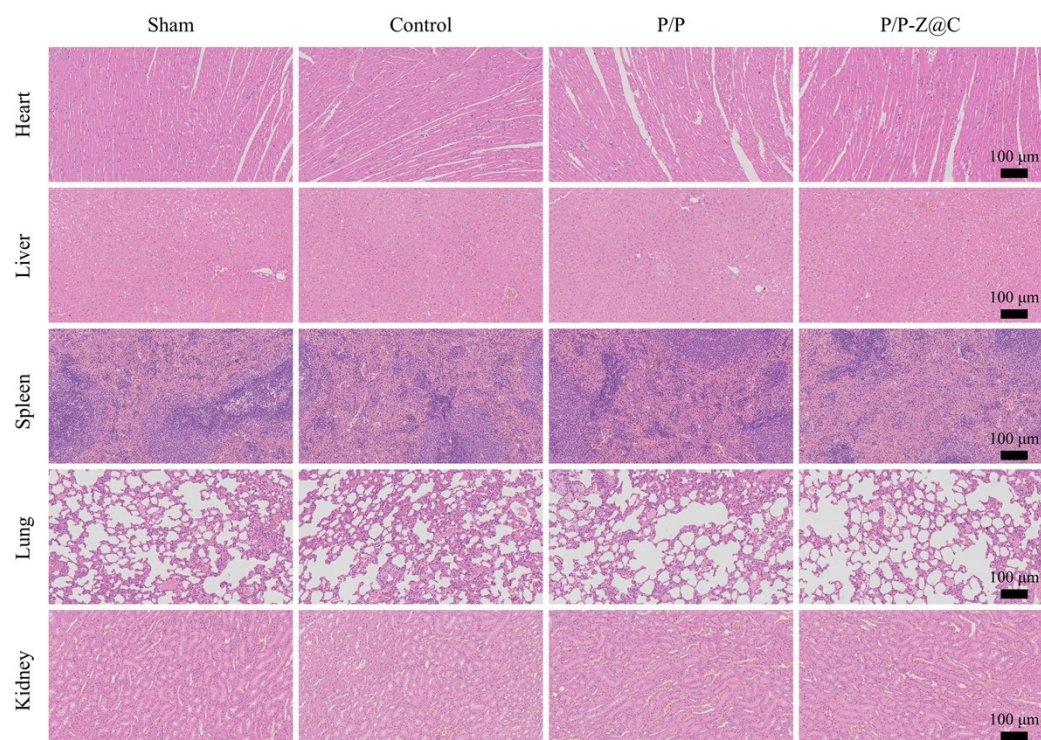

Figure S15 H&E staining of heart, liver, spleen, lung, and kidney tissues in vivo.
